# Supplementary material for: A well-defined thermo- and pH-responsive double hydrophilic graft copolymer bearing pyridine-containing backbone
Source: Royal Society of Chemistry journal article supplement (doi:10.1039/d2py00169a), 2022-01-01
Supplement: d2py00169a1.pdf [file d2py00169a1.pdf]

Supporting information for

# Well-Defined Thermo- and pH-Responsive Double Hydrophilic Graft Copolymer Bearing a Pyridine-Containing Backbone

*Rang Chen,<sup>a</sup> Xue Jiang,<sup>b,\*</sup> Guolin Lu,<sup>a</sup> Wenbin Liu,<sup>b,\*</sup> Weize Jin,<sup>a</sup>*

*Guojian Tian,<sup>b</sup> Xiaoyu Huang<sup>a,\*</sup>*

<sup>a</sup> Key Laboratory of Synthetic and Self-Assembly Chemistry for Organic Functional Molecules, Center for Excellence in Molecular Synthesis, Shanghai Institute of Organic Chemistry, University of Chinese Academy of Sciences, Chinese Academy of Sciences, 345 Lingling Road, Shanghai 200032, People's Republic of China

<sup>b</sup> Shanghai Key Laboratory of Crime Scene Evidence, Shanghai Research Institute of Criminal Science and Technology, Zhongshan North No 1 Road, Shanghai 200083, People's Republic of China

\* To whom correspondence should be addressed, E-mail: 13795305289@163.com (Tel: +86-21-22028164, Fax: +86-21-22028885), wbliu1981@163.com (Tel: +86-21-22028164, Fax: +86-21-22028885), xyhuang@mail.sioc.ac.cn (Tel: +86-21-54925310, Fax: +86-21-64166128).

## Supporting Figures

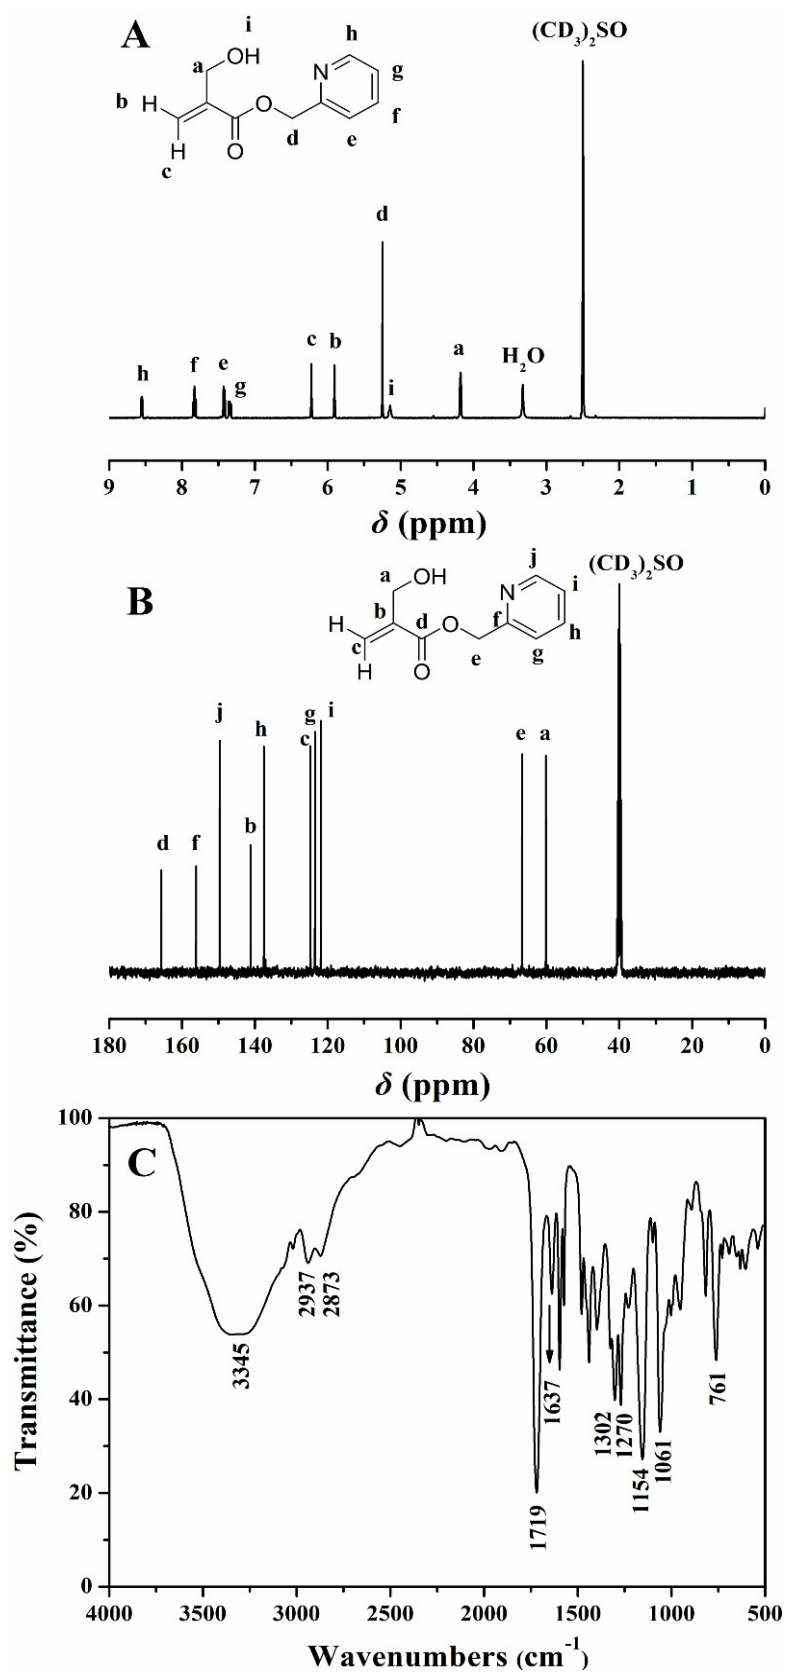

Figure S1.  $^1\text{H}$  NMR (A),  $^{13}\text{C}$  NMR (B) and FT-IR (C) spectra of PyMHMA.

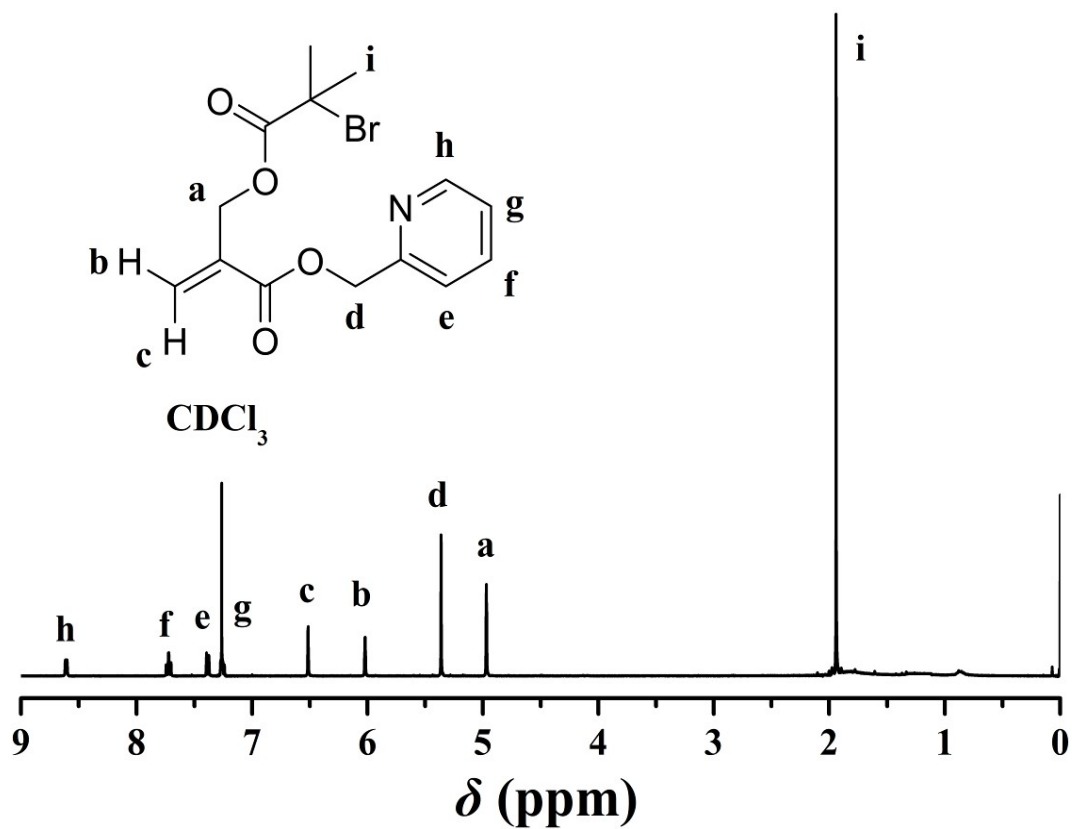

Figure S2. <sup>1</sup>H NMR spectrum of PyMBIBMA monomer in CDCl<sub>3</sub>.

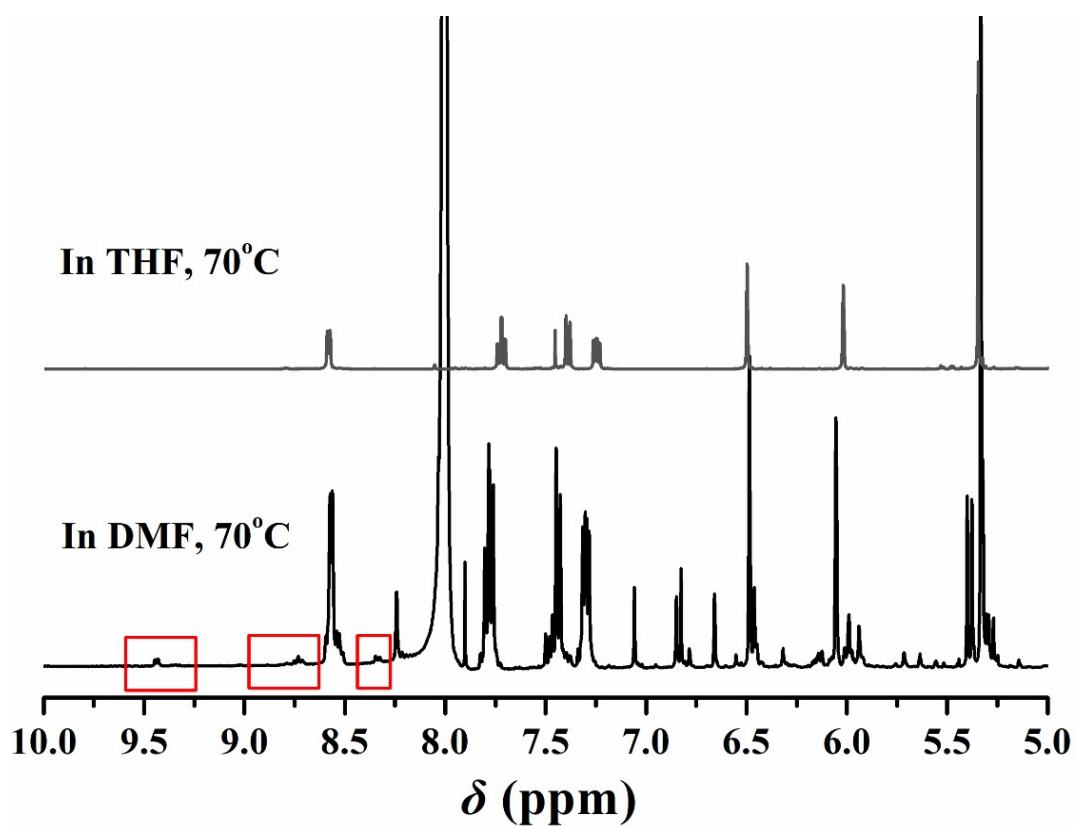

Figure S3. <sup>1</sup>H NMR spectra of PyMBIBMA in different solvents at 70°C in CDCl<sub>3</sub>.

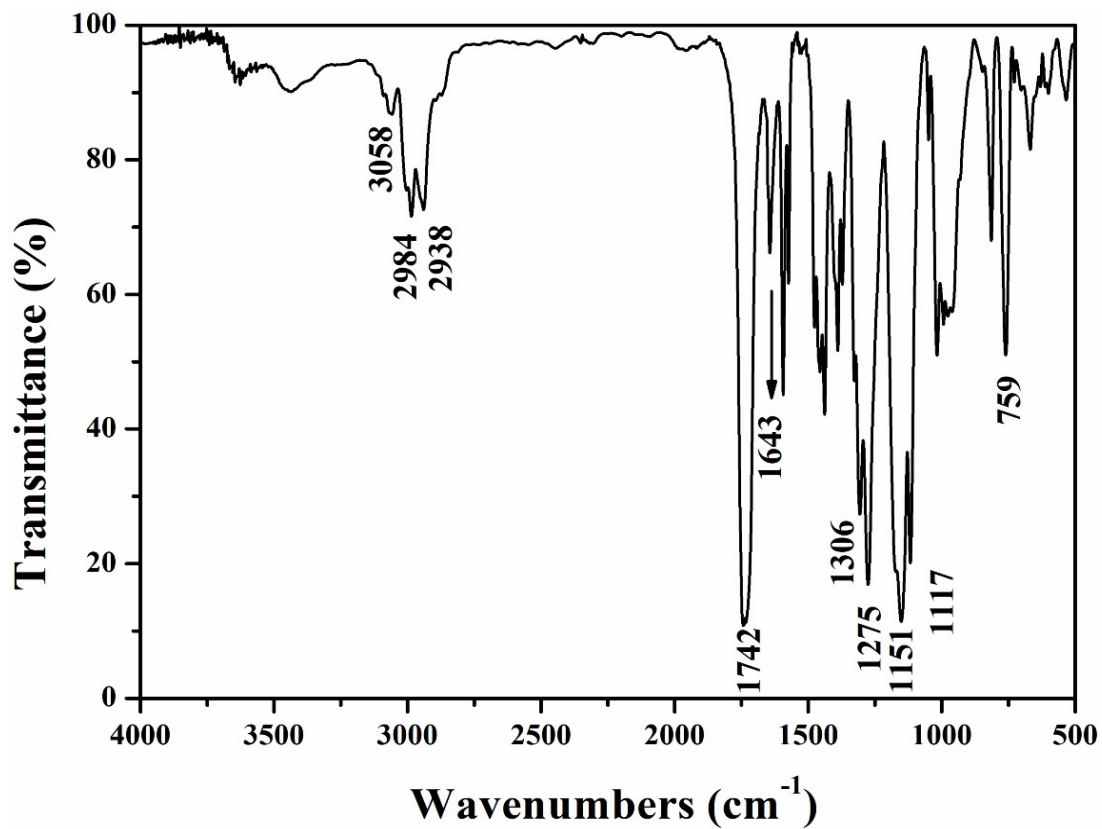

Figure S4. FT-IR spectrum of PyMCIBMA monomer.

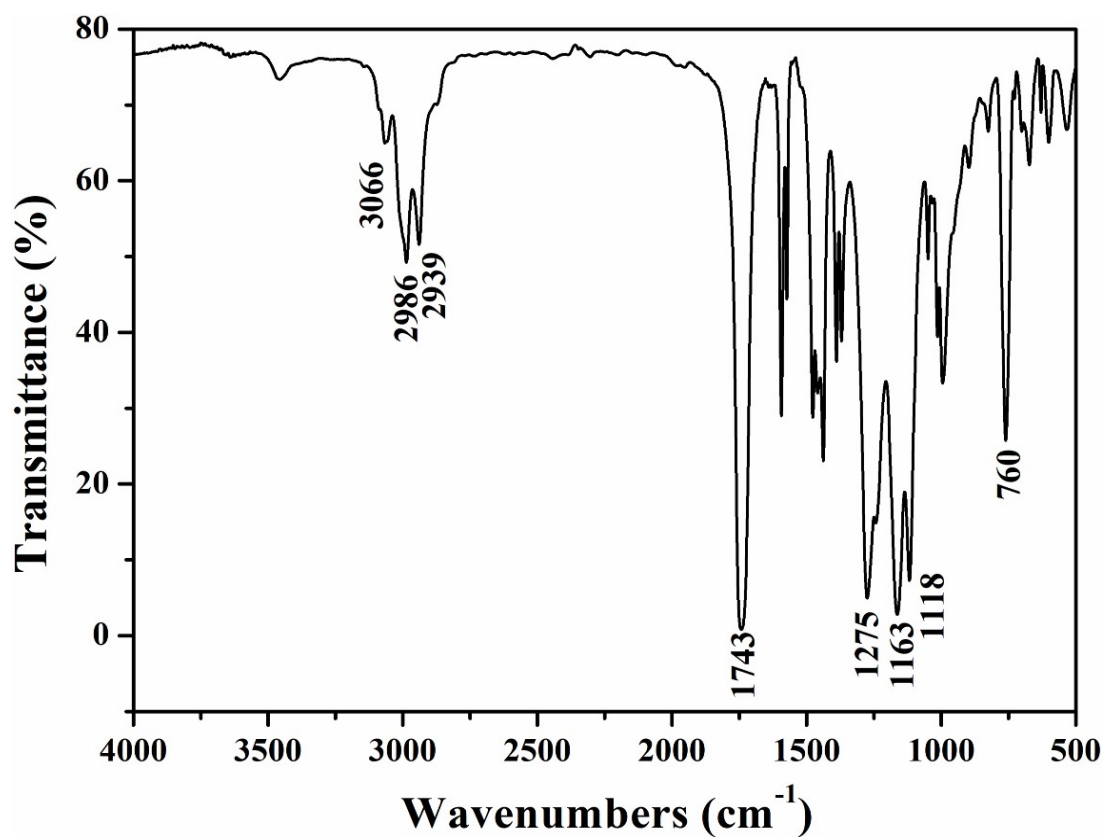

Figure S5. FT-IR spectrum of poly(PyMCIBMA)-S(C=S)Ph.

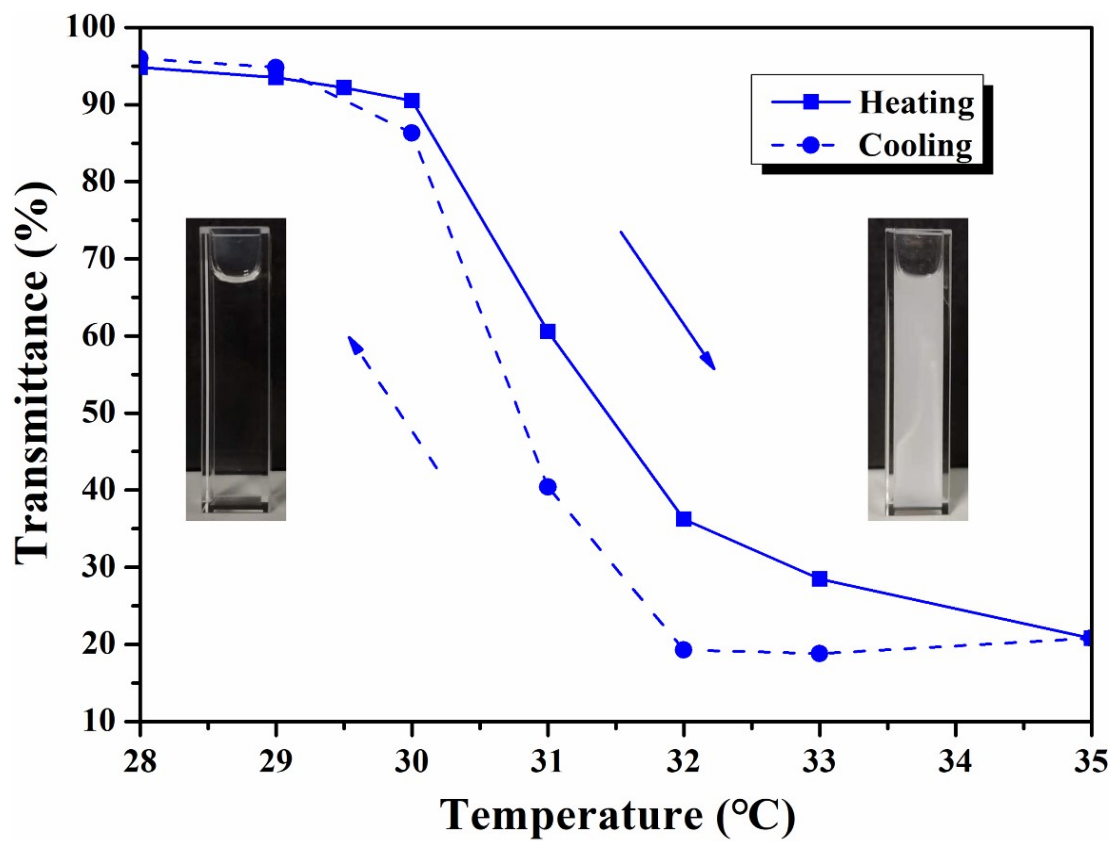

**Figure S6.** Transmittance vs. temperature for PPyMA-g-PNIPAM **5c** aqueous solutions at pH = 7.00 during one heating and cooling cycle.

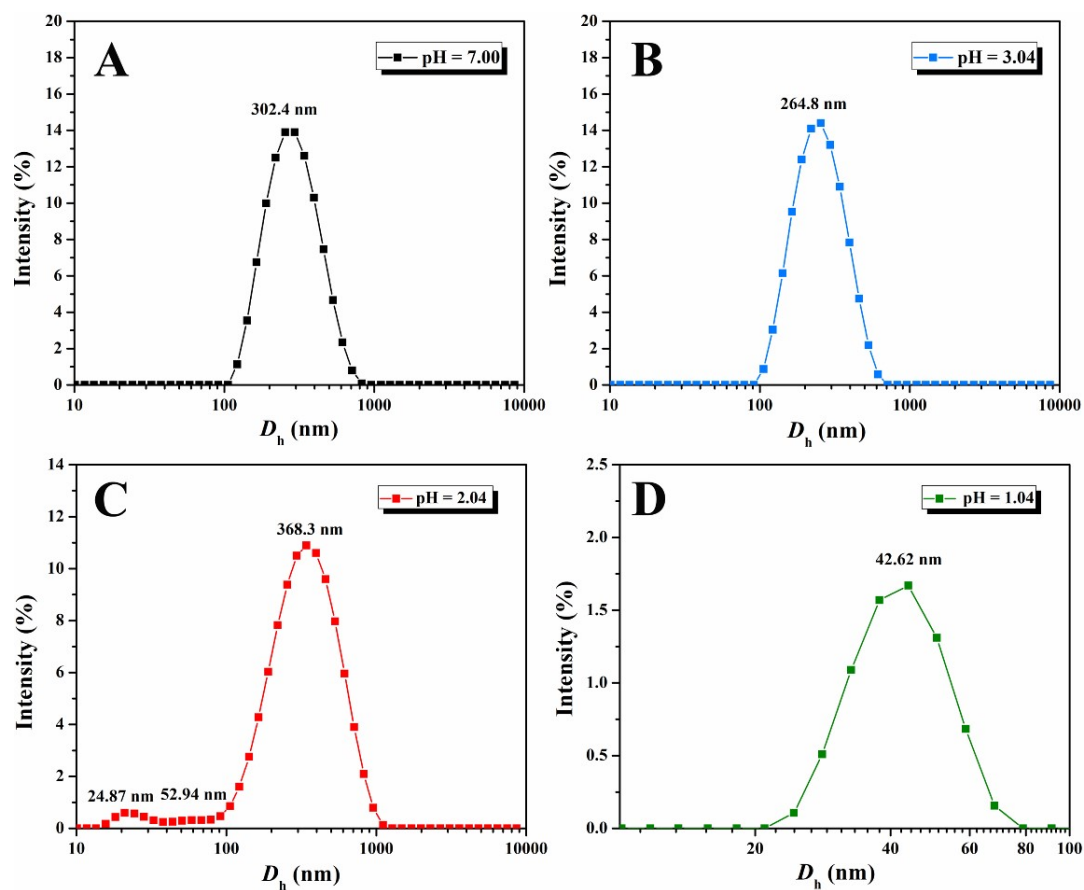

**Figure S7.** Distributions of hydrodynamic diameter of micelles formed by PPyMA-g-PNIPAM 5a (0.5 mg/mL), pH = 7.00 (A), 3.04 (B), 2.04 (C) and 1.04 (D).
